# Supplementary material for: Opioid-Free Anesthesia Benefit–Risk Balance: A Systematic Review and Meta-Analysis of Randomized Controlled Trials
Source: MDPI journal article supplement (doi:10.3390/jcm10102069), 2021-05-12
Supplement: s1 [file s1]

Supplementary data 1 - Trial characteristics

| Reference             | Group (n)                | Surgery                                    | Opioid regimen                                                        |                                                                                | Anaesthetic maintenance                                | PONV prevention                          | Postoperative analgesia                                                            | Outcomes                                             |
|-----------------------|--------------------------|--------------------------------------------|-----------------------------------------------------------------------|--------------------------------------------------------------------------------|--------------------------------------------------------|------------------------------------------|------------------------------------------------------------------------------------|------------------------------------------------------|
|                       |                          |                                            | Control                                                               | Opioid                                                                         |                                                        |                                          |                                                                                    |                                                      |
| Bakan et Al. 2015     | OFA (43)                 | Laparoscopic cholecystectomy               | Dexmedetomidine<br>I : 0.6 ug/kg in 10 min<br>M : 0.3 ug/kg/h         | Fentanyl<br>I : 2 ug/kg<br>M : 15 ug/kg/h                                      | Propofol<br>I : 1.5mg/kg<br>M : 10mg/kg/h              | 8mg i.v<br>Dexamethasone                 | Fentanyl i.v PCA                                                                   | Opioid consumption, postoperative pain, side effect  |
|                       | OBA (42)                 |                                            | Lidocaine<br>I : 1.5 mg/kg<br>M : 2 mg/kg/h                           |                                                                                |                                                        |                                          |                                                                                    |                                                      |
| Beloeil et Al. 2021   | OFA (158)                | Major and intermediate non cardiac surgery | Dexmedetomidine<br>I/M : 0.4 to 1.4 µg/kg/h                           | Remifentanyl<br>I/M : TCI 3 to 5 ng/ml                                         | Desflurane                                             | 8mg i.v<br>Dexamethasone                 | Morphine i.v PCA                                                                   | Opioid side event                                    |
|                       | OBA (158)                |                                            |                                                                       | i.v Morphine bolus of 0.05 mg/kg at the end of surgery                         | Lidocaine : 1.5 mg/kg/h<br><br>Ketamine : 0.25 mg/kg/h |                                          | Lidocaine 1.5 mg/kg/h for 12 hours<br><br>paracetamol 1g/6h<br><br>nefopam 20mg/6h |                                                      |
|                       |                          |                                            |                                                                       |                                                                                |                                                        |                                          |                                                                                    |                                                      |
| Bhardwaj et Al. 2019  | OFA (40)                 | Laparoscopic urological surgery            | Dexmedetomidine<br>I : 0.5 µg/kg over 10 min<br>M : 0.1 – 0.3 µg/kg/h | Fentanyl<br>I : 2 µg/kg<br>M : intermittent 0.5 µg/kg bolus                    | Propofol<br>50–200 µg/kg/min                           | 8mg i.v<br>Dexamethasone                 | 75mg i.v diclofenac 1mg i.v. paracetamol                                           | Opioid consumption, haemodynamic stability           |
|                       | OBA (40)                 |                                            | Lidocaine<br>I : 1.5 mg/kg<br>M : 0.1 mg/kg/h                         |                                                                                |                                                        | 4mg i.v<br>Ondansetron                   | Rescue : 100mg i.v Tramadol (additional 50 mg every 30 minutes, max 250mg)         |                                                      |
| Bulow et Al. 2007     | OFA (15)                 | Gynaecologic videolaparoscopic surgery     | Single 100µg of i.v fentanyl at the induction                         | Remifentanyl<br>I/M : 0.3µg/kg/min                                             | Propofol<br>TCI : 4.0-5.0µg/ml                         | None                                     | 100mg i.v ketoprofen                                                               | Haemodynamic stability, cortisol/glucose level       |
|                       | OBA (15)                 |                                            | Dexmedetomidine<br>M : 0.5µg/kg/h                                     |                                                                                |                                                        |                                          | Rescue 1g i.v Dypirone                                                             |                                                      |
| Choi J.W. et Al. 2016 | OFA (32)                 | Laparoscopic hysterectomy                  | Dexmedetomidine<br>I : 1 µg/kg over 10 min<br>M : 0.5 µg/kg/h         | OBA 1 : Fentanyl<br>I : 1.0 µg/kg<br>M : 0.4 µg/kg/h                           | Desflurane 6-7% volume                                 | None                                     | 30mg i.v ketorolac                                                                 | Haemodynamic stability, sedation, postoperative pain |
|                       | OBA 1 (31)<br>OBA 2 (30) |                                            |                                                                       | OBA 2 : Remifentanyl<br>I : 1.0 µg/kg<br>M : 0.08 µg/kg/min                    |                                                        |                                          |                                                                                    |                                                      |
| Choi E.K. et Al. 2017 | OFA (40)<br>OBA (40)     | Thyroidectomy                              | Dexmedetomidine<br>I : 1 µg/kg over 10 min<br>M : 0.3–0.5 µg/kg/h     | Remifentanyl<br>I : TCI 4 ng/ml<br>M : TCI of 2-3ng/mL                         | 1.0–2.5% Sevoflurane                                   | None                                     | None                                                                               | PONV                                                 |
| Cortinez et Al. 2001  | OFA (30)<br>OBA (30)     | Open gynaecological surgery                | Sevoflurane<br>I : 2%<br>M : 0.5±1.0% increments                      | Remifentanyl<br>I : 0.25mg/kg/min<br>M : 0.05±0.1mg/kg/min increment/decrement | Sevoflurane                                            | 0.2mg i.v Droperidol with each PCA bolus | Morphine i.v PCA (bolus dose 1mg, 8min lockout)                                    | Opioid consumption, postoperative pain               |

|                        |                      |                                                  |                                                                           |                                                                  |                                                                           |                              |                                                                                                                                                                                  |                                                                                              |
|------------------------|----------------------|--------------------------------------------------|---------------------------------------------------------------------------|------------------------------------------------------------------|---------------------------------------------------------------------------|------------------------------|----------------------------------------------------------------------------------------------------------------------------------------------------------------------------------|----------------------------------------------------------------------------------------------|
| Curry et Al.<br>1995   | OFA (22)<br>OBA (22) | laparoscopic<br>Electrocautery<br>tubal ligation | Saline<br>I : 1 µg /kg                                                    | Fentanyl<br>I : 1 µg /kg                                         | Propofol<br>200-300<br>µg/kg/min<br><br>Isoflurane not<br>exceeding 0.5%. | None                         | Fentanyl i.v PCA (25 µg<br>bolus dose, 5 min<br>lockout, no dose limit)                                                                                                          | Opioid<br>consumption,<br>postoperative<br>pain                                              |
| Feld et Al.<br>2006    | OFA (10)<br>OBA (10) | Open gastric<br>bypass                           | Dexmedetomidine<br>I : 0.5µg/kg over 10min<br>M : 0.4µg/kg/h              | Fentanyl<br>I : 0.5µg/kg<br>M : 0.5µg/kg/h                       | Desflurane                                                                | None                         | Morphine i.v PCA                                                                                                                                                                 | Haemodynamic<br>stability,<br>postoperative<br>pain                                          |
| Gazi et Al.<br>2018    | OFA (15)<br>OBA (15) | Hysteroscopy                                     | Dexmedetomidine<br>I/M : 0.2-0.7 µg/kg/h                                  | Remifentanyl<br>I/M : 0.05-0.5µg/kg/min                          | 2% Fi<br>sevoflurane                                                      | 0.1 mg/kg i.v<br>Ondansetron | 1000 mg i.v Paracetamol                                                                                                                                                          | intraoperative<br>pain,<br>haemodynamic<br>stability,<br>postoperative<br>pain, side effect  |
| Goyal et Al.<br>2017   | OFA (30)<br>OBA (30) | Breast cancer                                    | Dexmedetomidine<br>I : 1 µg/kg over 10 min<br>M : 0.25 µg/kg/h            | Fentanyl<br>I : 2 µg/kg over 10 min<br>M : 0.5 µg/kg/h           | Desflurane                                                                | None                         | 1mg/kg i.v Diclofenac<br>and 1g i.v Paracetamol<br><br>Rescue :<br>1mg/kg i.v tramadol and<br>10mg i.v Pethidine (max<br>50 mg) as second rescue<br>analgesia                    | Opioid<br>consumption,<br>haemodynamic<br>stability,<br>halogene<br>requirement,<br>recovery |
| Hakim et<br>Al. 2019   | OBA (40)<br>OFA (40) | Gynecological<br>laparoscopic<br>surgery         | Dexmedetomidine<br>I : 0.6 µg/kg over 5 min<br>M : 0.2µg/kg/h ±0.1µg/kg/h | Fentanyl<br>I : 1 µg/kg over 5 min<br>M : 0.5µg/kg/h ±0.1µg/kg/h | Propofol<br>I/M : 5–10<br>mg/kg/h                                         | None                         | 30mg i.v Ketorolac, and<br>1g i.v acetaminophen<br>every 8 h<br><br>Rescue : 0.5 µg/kg i.v<br>Tramadol                                                                           | Recovery                                                                                     |
| Hontoir et<br>Al. 2016 | OFA (33)<br>OBA (33) | Breast cancer<br>surgery                         | Clonidine<br>I : 0.2 µg/kg                                                | Remifentanyl<br>I/M : TCI                                        | Sevoflurane                                                               | 4mg i.v<br>Ondansetron       | 1g i.v Paracetamol and<br>75mg i.v Diclofenac and<br>0.03mg/kg i.v Piritramide<br><br>Piritramide i.v PCA (2 mg<br>bolus, 10min lockout<br>interval, maximum dose<br>of 20mg/4h) | Recovery, opioid<br>consumption,<br>postoperative<br>pain                                    |
| Hossam et<br>Al. 2017  | OFA (30)<br>OBA (30) | Arthroscopic<br>shoulder surgery                 | Dexmedetomidine<br>I : 1µg/kg over 10min<br>M : 0.5µg/kg/h                | Fentanyl<br>I : 1µg/kg<br>M : 0.5µg/kg/h                         | 1.5% isoflurane                                                           | None                         | Rescue : 0.04 mg/kg i.v<br>morphine bolus                                                                                                                                        | Haemodynamic<br>stability,<br>postoperative<br>pain, sedation                                |
| Hwang et<br>Al. 2017   | OFA (20)<br>OBA (20) | Posterior lumbar<br>interbody fusion             | Dexmedetomidine<br>I/M : 0.01-0.02µg/kg/min                               | Remifentanyl<br>I/M : 0.01-0.02 µg/ kg/min                       | propofol<br>I/M : 3-12<br>mg/kg/h                                         | 0.3mg i.v<br>Ramosetron      | i.v Hydromorphone PCA<br>(background rate of<br>0.12mg/h, 0.12mg bolus)                                                                                                          | Opioid<br>consumption,                                                                       |

|                                   |                      |                                          |                                                                                       |                                                                                     |                                                 |                                                                                |                                                                                                                                                    |                                                      |
|-----------------------------------|----------------------|------------------------------------------|---------------------------------------------------------------------------------------|-------------------------------------------------------------------------------------|-------------------------------------------------|--------------------------------------------------------------------------------|----------------------------------------------------------------------------------------------------------------------------------------------------|------------------------------------------------------|
|                                   |                      |                                          |                                                                                       |                                                                                     |                                                 |                                                                                | dose, 10min lockout interval of 10 minutes                                                                                                         | postoperative pain, PONV                             |
| Inoue et Al. 2005                 | OFA (25)<br>OBA (25) | Cervical spine surgery                   | Single 100µg i.v fentanyl bolus at the induction<br><br>M : 1.5%-2.5% Fet Sevoflurane | Fentanyl<br>I : 100µg i.v<br>M : 50µg intermittent bolus + 0.5-1.0% Fet Sevoflurane | Sevoflurane                                     | None                                                                           | Rescue : 1 µg/kg i.v<br>Fentanyl or 50 mg i.v<br>Tramadol<br><br>50mg i.v Flurbiprofen axetil<br><br>Rescue : 50µg i.m<br>Fentanyl                 | Recovery                                             |
| Javaherforo o-shzadeh et Al. 2018 | OFA (30)<br>OBA (30) | Lumbar discopathy surgery                | Fentanyl<br>I : 2 to 3µg/kg<br><br>Dexmedetomidine<br>M : 0.3 to 0.7µg/kg/h           | Fentanyl<br>I : 2 to 3µg/kg<br><br>Remifentanyl<br>M : 0.1 to 1.0µg/kg/h            | Propofol 50 to 100µg/kg/min                     | None                                                                           | None                                                                                                                                               | Haemodynamic stability, blood loss                   |
| Jung et Al. 2011                  | OFA (25)<br>OBA (25) | Elective total laparoscopic hysterectomy | Dexmedetomidine<br>I : 1 µg/kg over 10 min<br>M : 0.2-0.7 µg/kg/h                     | Remifentanyl<br>I : 0.8-1.2 µg/kg over 1 min<br>M : 0.05-0.1 µg/kg/h                | 6-7 vol.% of desflurane                         | None                                                                           | 30mg i.v ketorolac                                                                                                                                 | heamodynamic stability, sedation, postoperative pain |
| Kataria et Al. 2016               | OFA (30)<br>OBA (30) | Laparoscopic cholecystectomy             | Dexmedetomidine<br>I : 1 µg/kg<br>M : 0.2 µg/kg                                       | Fentanyl<br>I : 1 µg/kg<br>M : 0.2 µg/kg intermittent bolus.                        | Isoflurane                                      | None                                                                           |                                                                                                                                                    | haemodynamic stability                               |
| Katz et Al. 1996                  | OFA (15)<br>OBA (15) | Hysterectomy                             | Saline                                                                                | Alfentanil<br>I : 30ug/kg<br>M : 10-20ug/kg every hour                              | Isoflurane                                      | None                                                                           | Morphine i.v PCA (1,5-2.0mg bolus, 5-7min lockout intervalle, maximum dose of 30 mg/4h)                                                            | Opioid consumption, postoperative pain               |
| Lee C. et Al. 2011                | OFA (30)<br>OBA (30) | Tonsillectomy                            | Saline                                                                                | Remifentanyl<br>I : 1 µg/kg<br>M : 0.1 µg/kg/min ± 0.05 µg/kg/min increment         | Sevoflurane<br>OFA titrated on BIS<br>OBA 1 MAC | None                                                                           | Rescue : 25mg i.v<br>Pethidine 25 mg (VAS ≥ 4) or 30mg i.v Ketorolac (VAS < 4)                                                                     | Opioid consumption, postoperative pain               |
| Lee J. et Al. 2013                | OFA (32)<br>OBA (34) | Endoscopic sinus surgery                 | Dexmedetomidine<br>I : 1 µg/kg over 10min<br>M : 0.4-0.8 µg/kg/h.                     | Remifentanyl<br>I : 1 µg/kg over 1 min<br>M : 0.2-0.4 µg/kg/min                     | 5 to 7 vol% Desflurane                          | None                                                                           | Rescue : 30mg i.v ketorolac<br>tromethamine 30 mg                                                                                                  | Haemodynamic stability                               |
| Mansour et Al. 2013               | OFA (15)<br>OBA (13) | Laparoscopic sleeve surgery              | Ketamine<br>I : 0.5 mg/kg<br>M : 0.5 mg/kg/h (IBW)                                    | Fentanyl<br>I : 2-5 µg/kg<br>M : 0.025-0.25µg /kg/min (IBW)                         | 2-4% sevoflurane                                | 50mg i.v<br>Ranitidine + 10mg i.v<br>Metoclopramide + 8mg i.v<br>Dexamethasone | OFA : 1g/6h i.v<br>Paracetamol and 75mg/12h i.m and 60-100mg/12h i.v and Tramadol i.v PCA (10mg bolus, 6min lock-out interval, no basal infusion). | Haemodynamic stability                               |

|                           |                                                    |                                              |                                                                                                                                                               |                                                                                                    |                         |                                               |                                                                                                                                        |                                                                                |
|---------------------------|----------------------------------------------------|----------------------------------------------|---------------------------------------------------------------------------------------------------------------------------------------------------------------|----------------------------------------------------------------------------------------------------|-------------------------|-----------------------------------------------|----------------------------------------------------------------------------------------------------------------------------------------|--------------------------------------------------------------------------------|
|                           |                                                    |                                              |                                                                                                                                                               |                                                                                                    |                         |                                               | Rescue : 2-4m/2h i.v Morphine                                                                                                          |                                                                                |
|                           |                                                    |                                              |                                                                                                                                                               |                                                                                                    |                         |                                               | OBA : 1g/6h i.v Paracetamol and Fentanyl i.v PCA (10µg bolus, 6min lock-out interval)                                                  |                                                                                |
| Mogahead 2017             | OFA (40)<br>OBA (40)                               | Laparoscopic cholecystectomy                 | Dexmedetomidine<br>I : 0.7 ug/kg over 10 min<br>M : 0.4 ug/kg/h                                                                                               | Remifentanyl<br>I : 0.7 ug/kg over 10 min<br>M : 0.2 ug/kg/h                                       | 1-1.5MAC<br>Sevoflurane | 8mg i.v Dexamethasone and 4mg i.v Ondansetron | Rescue : 25 mg i.v fentanyl                                                                                                            | Expiratory fraction Sevoflurane concentration                                  |
| Mulier et Al. 2018        | OFA (25)<br>OBA (25)                               | laparoscopic bariatric surgery               | Dexmedetomidine<br>I : 0.5 mg/kg over 10 min<br>M : 0.25 - 1 mg/kg/h<br><br>Ketamine<br>I : 0.25 mg/kg<br><br>Lidocaine<br>I : 1.5 mg/kg<br>M : 1.5-3 mg/kg/h | Sufentanyl<br>I : 0.5 mg/kg<br>M : 0.25-1 mg/kg/ (IBW)                                             | Sevoflurane             | None                                          | 2g i.v Paracetamol then 1g/6h<br>And Morphine i.v PCA (2mg bolus, 5min lock-out interval, no basal infusion)                           | Haemodynamic stability, opioid consumption, recovery                           |
| Ryu et Al. 2019           | OFA (40)<br>OBA (40)                               | Middle ear surgery                           | Magnesium sulfate<br>I : 50mg/kg over 10 min<br>M : 15mg/kg/h                                                                                                 | Remifentanyl<br>I : TCI 4ng/ml<br>M : TCI 3-4 ng/ml                                                | Sevoflurane             | None                                          | 30mg i.v Ketorolac                                                                                                                     | Haemodynamic stability, postoperative pain                                     |
| Sahoo et Al. 2016         | OFA (80)<br>OBA (80)                               | Laparoscopic gynaecological surgery          | Dexmedetomidine<br>I : 0.01µg/kg/min<br>M : 0.05 µg/kg/min                                                                                                    | Remifentanyl<br>I : 0.01 µg/kg/min<br>M : 0.05µg/kg/min                                            | Propofol 3-12 mg/kg/h   | 0.3mg i.v Ondansetron                         | Morphine i.v PCA (2 mg bolus, background rate of 1 mg/h, 10min lockout interval)<br>Rescue : 1 µg/kg i.v Fentanyl or 50mg i.v Tramadol | Opioid consumption, postoperative pain, PONV                                   |
| Salman et Al. 2019        | OFA (30)<br>OBA (30)                               | Ambulatory gynaecologic laparoscopic surgery | Dexmedetomidine<br>I : 1 µg/kg over 10min<br>M : 0.4 µg/kg/h                                                                                                  | Remifentanyl<br>I : 1 µg/kg over 10 min<br>M : 0.2 µg/kg/min                                       | 6% desflurane           | None                                          | 1g p.o Paracetamol<br><br>Rescue : 30-40 µg /kg morphine                                                                               | Haemodynamic stability, opioid consumption, postoperative pain, PONV, recovery |
| Senol Karatas et Al. 2015 | OFA (16)<br>OBA 1 (16)<br>OBA 2 (16)<br>OBA 3 (16) | major abdominal surgery                      | Saline<br>I : 5 cc bolus<br>M : 10 cc/h                                                                                                                       | OBA 1 : Remifentanyl<br>I : 1µg/kg<br>M : 0.25 µg/kg/min<br><br>OBA 2 : Alfentanyl<br>I : 10 µg/kg | 1 MAC desflurane        | None                                          | 1 g i.v Paracetamol and 1 mg/kg i.v Mepiridine<br><br>Meperidine i.v PCA (15mg bolus dose, 8min lockout time)                          | Opioid consumption                                                             |

|                          |                                   |                                      |                                                                                                                                              |                                                                                            |                        |                             |                                                                                                                                  |                                                                          |
|--------------------------|-----------------------------------|--------------------------------------|----------------------------------------------------------------------------------------------------------------------------------------------|--------------------------------------------------------------------------------------------|------------------------|-----------------------------|----------------------------------------------------------------------------------------------------------------------------------|--------------------------------------------------------------------------|
|                          |                                   |                                      |                                                                                                                                              | M : 0.50 µg/kg/min                                                                         |                        |                             |                                                                                                                                  |                                                                          |
|                          |                                   |                                      |                                                                                                                                              | OBA 3 : Morphine<br>I : 0.1 mg/kg<br>M : 0.02 mg/kg/h                                      |                        |                             |                                                                                                                                  |                                                                          |
| Subasi et Al. 2017       | OFA (20)<br>OBA (20)              | Laparoscopic cholecystectomy         | Single 1µg/kg i.v Fentanyl bolus at the induction<br><br>Dexmedetomidine<br>M : 0.5µg/kg/h lowered to 0.3 µg/kg/h after 5 minute of infusion | Fentanyl<br>I : 1µg/kg<br>M : 0.5µg/kg/h lowered to 0.3 µg/kg/h after 5 minute of infusion | Propofol 150 µg/kg/min | None                        | Morphine i.v PCA (1mg bolus dose, 20min lockout interval)                                                                        | Haemodynamic stability, opioid consumption, postoperative pain, recovery |
| Techanivat e et Al. 2012 | OFA (20)<br>OBA (20)              | Outpatient gynaecologic laparoscopy  | Dexmedetomidine<br>I : 0.5 µg/kg<br>no maintenance                                                                                           | Fentanyl<br>I : 0.5 µg/kg<br>no maintenance                                                | desflurane             | None                        | 1g p.o paracetamol<br>Rescue : 25µg i.v Fentanyl.                                                                                | Postoperative pain                                                       |
| Toleska et Al. 2019      | OFA (30)<br>OBA (30)              | Laparoscopic cholecystectomy         | Ketamine<br>I : 0.5 mg/kg<br><br>Lidocaine<br>M : 2 mg/kg/h<br><br>Magnesium sulphate<br>M : 1.5 g/h                                         | Fentanyl :<br>I : 2µg/kg<br>M : intermittent Fentanyl bolus                                | 0.7-1 MAC Sevoflurane  | 0.1 mg/kg i.v Dexamethasone | 1g i.v Paracetamol, and 2.5g Metamizole (OBA)<br><br>Rescue : 100mg i.v Ketoprofen or 100mg i.v Trodon                           | Opioid consumption, postoperative pain                                   |
| Tverskoy et Al. 1994     | OFA 1 (9)<br>OFA 2 (9)<br>OBA (9) | Elective transabdominal hysterectomy | OFA 1 : ketamine<br>I : 2 mg/kg<br>M : 20 pg/kg/min<br><br>OFA 2 : isoflurane only                                                           | Fentanyl<br>I : 5 pg/kg<br>M : 0.02 pg/kg/min                                              | Isoflurane             | None                        | First 9h : i.v meperidine on demand<br>9 to 24h : 50mg/4h i.m<br>Meperidine ± 25 mg on demand<br>> 24h : 0.5g/4h p.o<br>Dipyrone | Postoperative pain                                                       |

*OFA : Opioid-free anaesthesia ; OBA : Opioid based anaesthesia ; PONV : Postoperative nausea and vomiting ; I : induction period ; M : maintenance period ; i.v : intravenous ; i.m : intramuscular ; PCA : patient-controlled analgesia ; TCI : target-controlled infusion*

## Supplementary data 2 : Subgroup analysis

### Subgroup analysis for morphine at 24h

| Outcomes                | Number of trials | Number of participants | SMD Random effect [95% CI] | Heterogeneity (I <sup>2</sup> ) | Heterogeneity (I <sup>2</sup> ) – Test for subgroup differences |
|-------------------------|------------------|------------------------|----------------------------|---------------------------------|-----------------------------------------------------------------|
| Active drug             | 5                | 200                    | -3.84 [-5.03, -2.65]       | 0%                              | 91%                                                             |
| Saline                  | 5                | 227                    | 0.84 [-1.70, 3.39]         | 66%                             |                                                                 |
| Strict OFA              | 7                | 327                    | -1.58 [-3.64, 0.48]        | 72%                             | 0%                                                              |
| Opioid during induction | 2                | 100                    | -2.86 [-6.20, 0.48]        | 33%                             |                                                                 |
| PCA                     | 7                | 340                    | -2.65 [-5.20, -0.11]       | 74%                             | 74%                                                             |
| No PCA                  | 2                | 87                     | 0.10 [-3.55, 3.76]         | 66%                             |                                                                 |
| Propofol                | 2                | 77                     | -4.17 [-6.19, -2.15]       | 19%                             | 74%                                                             |
| halogenated agents      | 7                | 350                    | -0.89 [-2.76, 0.99]        | 62%                             |                                                                 |

# Subgroup analysis for pain at 24h

| Outcomes                | Number of trials | Number of participants | SMD<br>Random effect<br>[95% CI] | Heterogeneity (I <sup>2</sup> ) | Heterogeneity (I <sup>2</sup> ) –<br>Test for subgroup differences |
|-------------------------|------------------|------------------------|----------------------------------|---------------------------------|--------------------------------------------------------------------|
| Active drug             | 9                | 547                    | 0.02 [-0.88, 0.91]               | 94%                             | 0%                                                                 |
| Saline                  | 2                | 100                    | 0.23 [-0.28, 0.74]               | 74%                             |                                                                    |
| Strict OFA              | 9                | 547                    | 0.05 [-0.70, 0.79]               | 93%                             | 0%                                                                 |
| Opioid during induction | 2                | 100                    | -0.25 [-0.43, -0.06]             | 0%                              |                                                                    |
| PCA                     | 8                | 500                    | -0.46 [-0.98, 0.06]              | 86%                             | 71%                                                                |
| No PCA                  | 3                | 147                    | 1.04 [-0.44, 2.53]               | 95%                             |                                                                    |
| Propofol                | 3                | 237                    | -1.00 [-2.61, 0.61]              | 91%                             | 48%                                                                |
| Halogenated agents      | 8                | 410                    | 0.23 [-0.45, 0.91]               | 92%                             |                                                                    |

# Subgroup analysis for nausea at PACU

| Outcomes                | Number of trials | Number of participants | RR<br>Random effect<br>[95% CI] | Heterogeneity (I <sup>2</sup> ) | Heterogeneity (I <sup>2</sup> ) –<br>Test for subgroup<br>differences |
|-------------------------|------------------|------------------------|---------------------------------|---------------------------------|-----------------------------------------------------------------------|
| Active drug             | 18               | 1417                   | 0.45 [0.37, 0.55]               | 13%                             | 0%                                                                    |
| Saline                  | 2                | 104                    | 0.57 [0.36, 0.90]               | 0%                              |                                                                       |
| Strict OFA              | 17               | 1371                   | 0.31 [0.22, 0.43]               | 12%                             | 15%                                                                   |
| Opioid during induction | 3                | 150                    | 0.52 [0.19, 1.47]               | 23%                             |                                                                       |
| PCA                     | 7                | 717                    | 0.37 [0.26, 0.52]               | 12%                             | 71%                                                                   |
| No PCA                  | 13               | 804                    | 0.31 [0.21, 0.46]               | 15%                             |                                                                       |
| Propofol                | 7                | 526                    | 0.32 [0.20, 0.50]               | 10%                             | 15%                                                                   |
| Halogenated agents      | 13               | 995                    | 0.35 [0.26, 0.48]               | 23%                             |                                                                       |
